# Supplementary material for: Nanolayered manganese–calcium oxide as an efficient catalyst toward organic sulfide oxidation
Source: Royal Society of Chemistry journal article supplement (doi:10.1039/c4ra00008k), 2014-01-01
Supplement: c4ra00008k1.pdf [file c4ra00008k1.pdf]

## **Electronic Supplementary Information (ESI)**

# Nanolayered manganese-calcium oxide as an efficient catalyst toward organic sulfide oxidation

Mojtaba Amini,<sup>\*a</sup> Mohammad Mahdi Najafpour,<sup>\*b,c</sup> Hadi Naslhajian,<sup>a,d</sup> Emad Amini<sup>b</sup> and S. Morteza F. Farnia<sup>d</sup>

<sup>a</sup>Department of Chemistry, Faculty of Science, University of Maragheh, Golshahr, P.O. Box. 55181-83111731, Maragheh, Iran

<sup>b</sup>Department of Chemistry, Institute for Advanced Studies in Basic Sciences (IASBS), Zanjan, 45137-66731, Iran

<sup>c</sup>Center of Climate Change and Global Warming, Institute for Advanced Studies in Basic Sciences (IASBS), Zanjan, 45137-66731, Iran

<sup>d</sup>Department of Chemistry, University of Tehran, Tehran, Iran

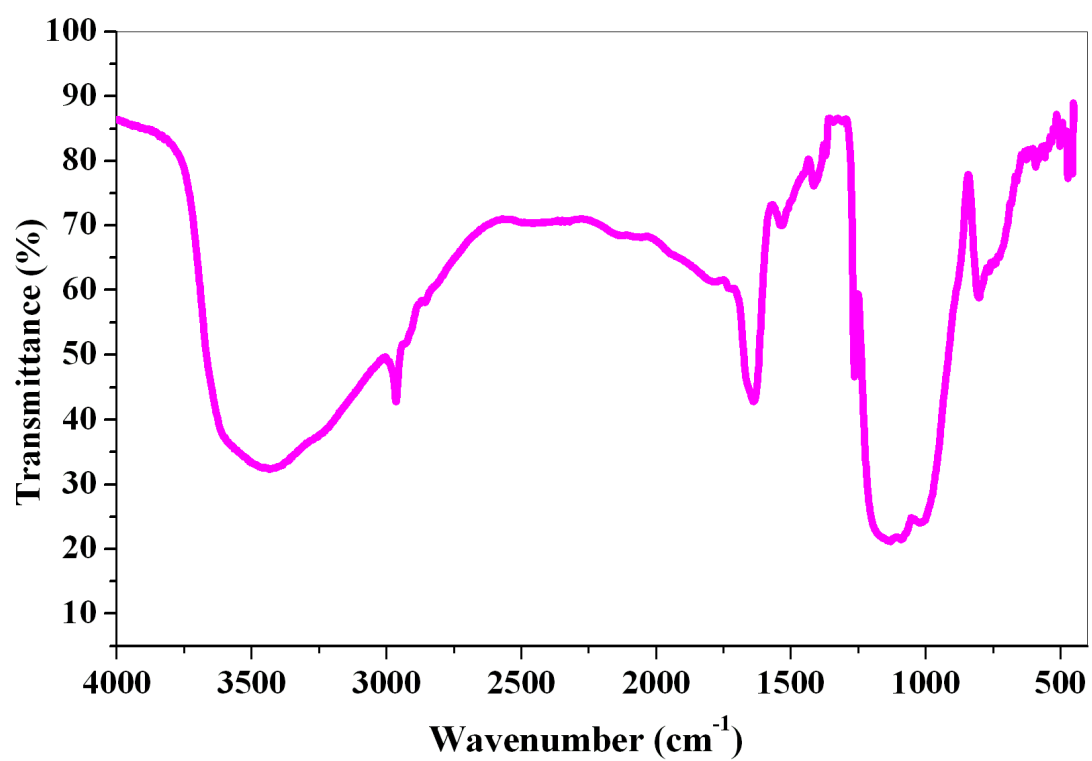

Fig. S1 Reflectance infrared Fourier transform spectra of Mn-Ca oxide.

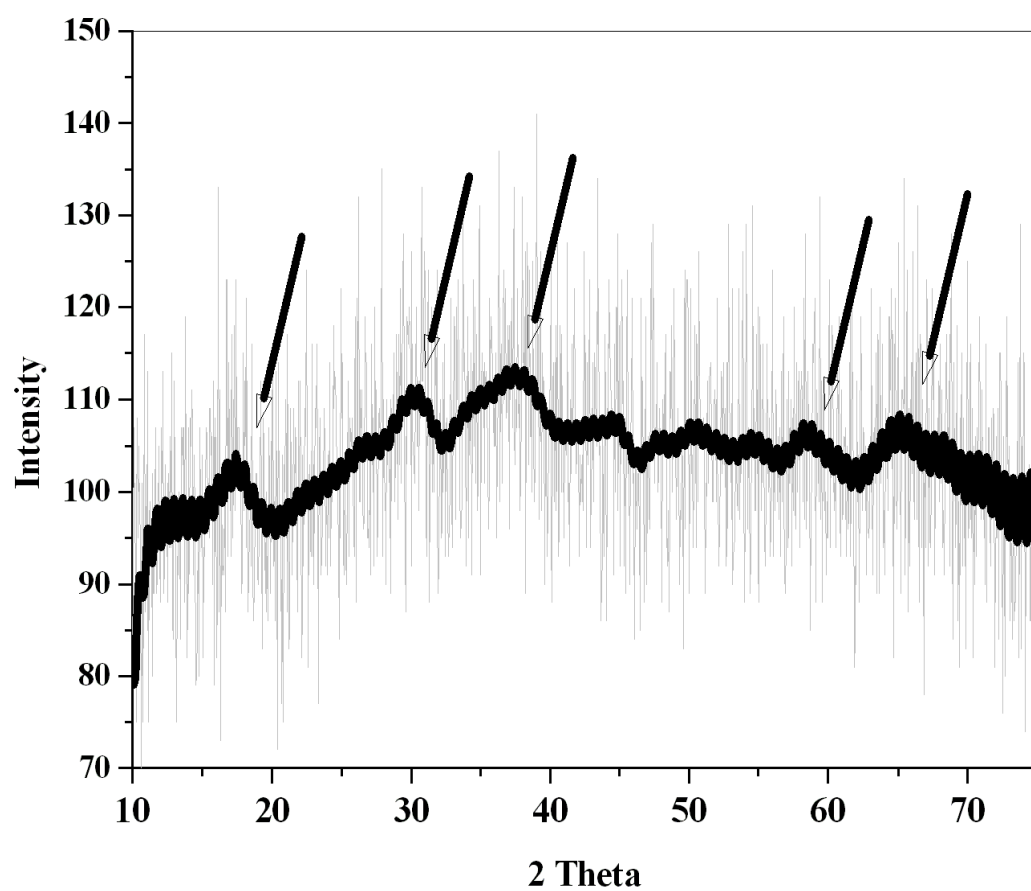

Fig. S2 XRD patterns of the obtained of nanolayered Mn-Ca oxide (grey) and FFT Filter Smoothing (black) of XRD patterns of the compound. FFT Filter Smoothing shows peaks related to layered Mn oxide.

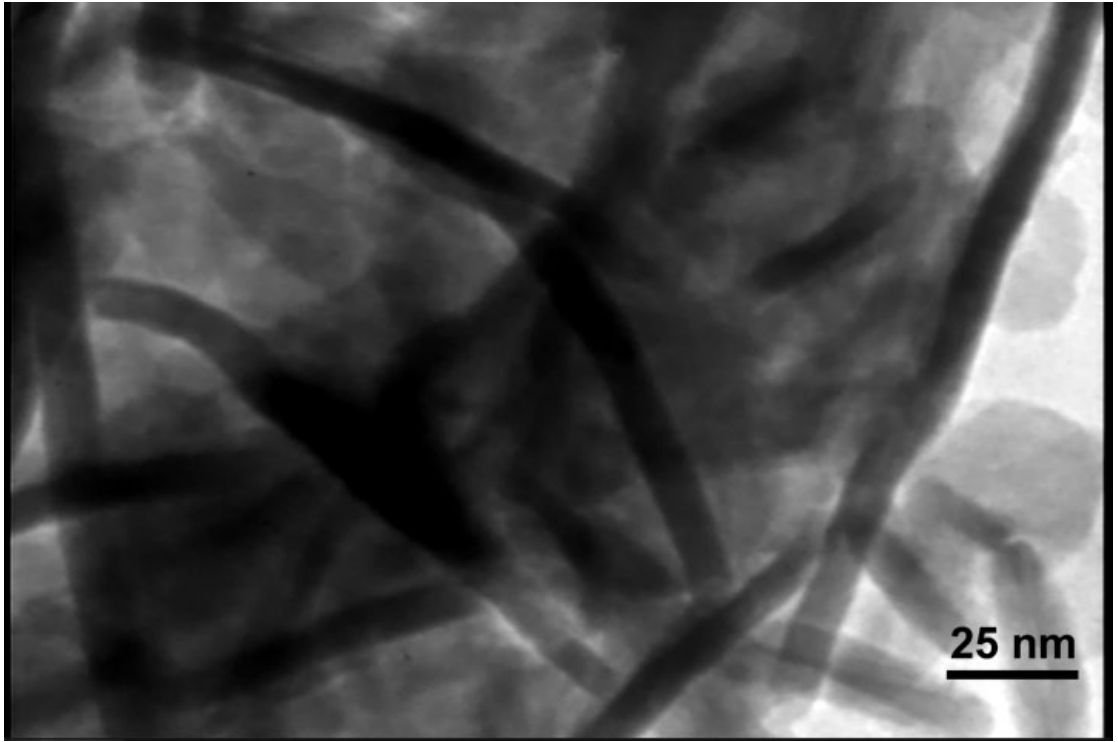

a

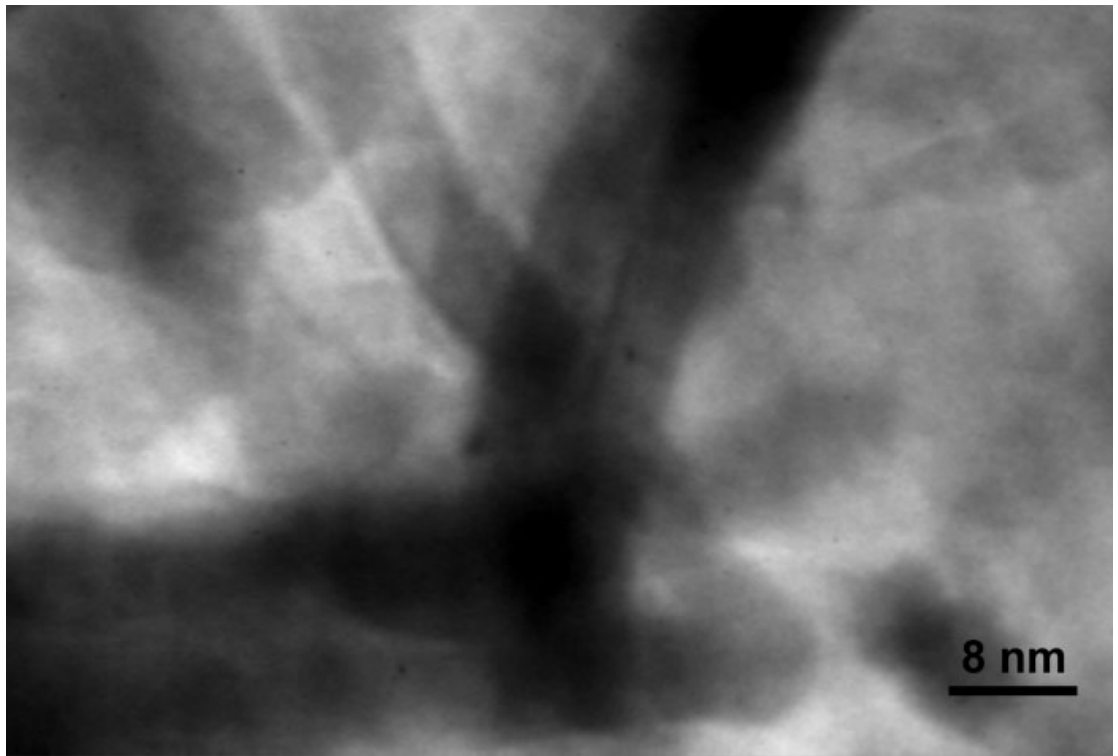

b

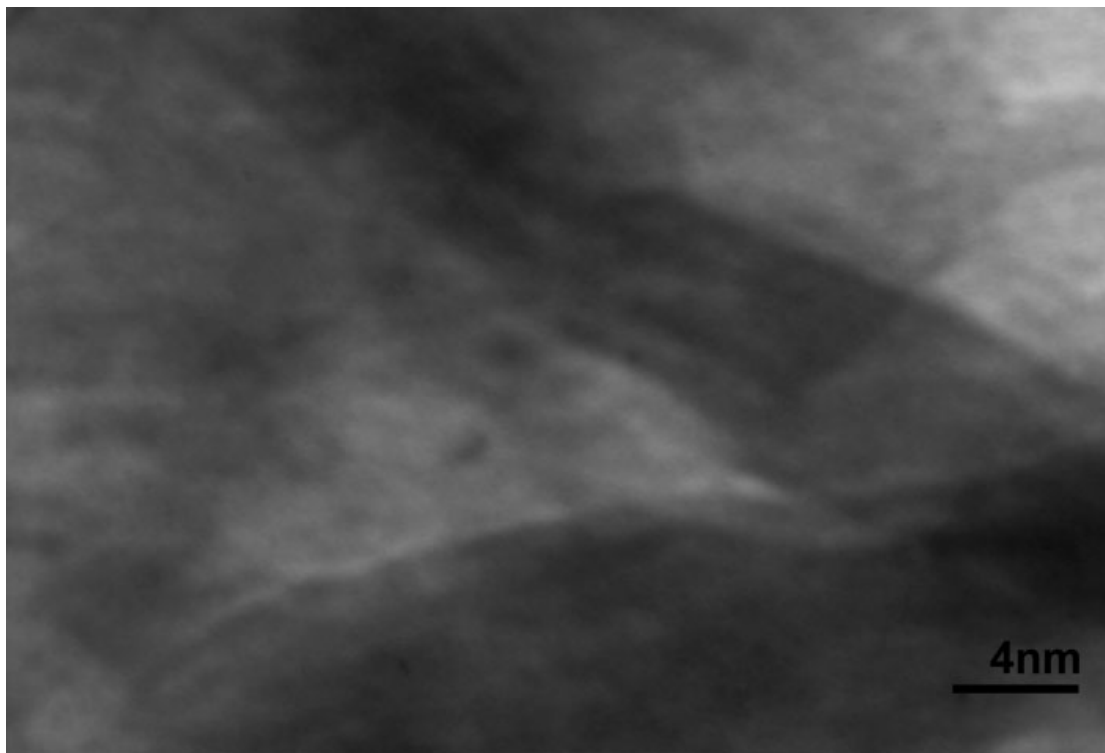

c

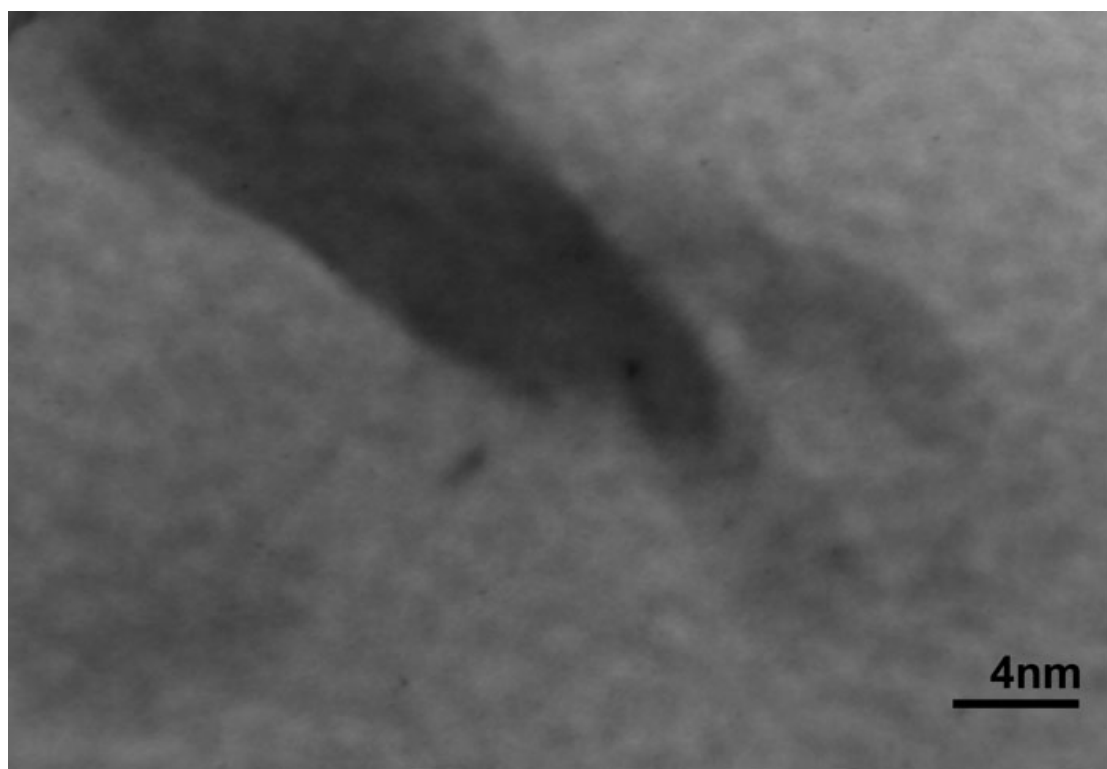

d

Fig. S3 TEM images for the Mn-Ca oxide.

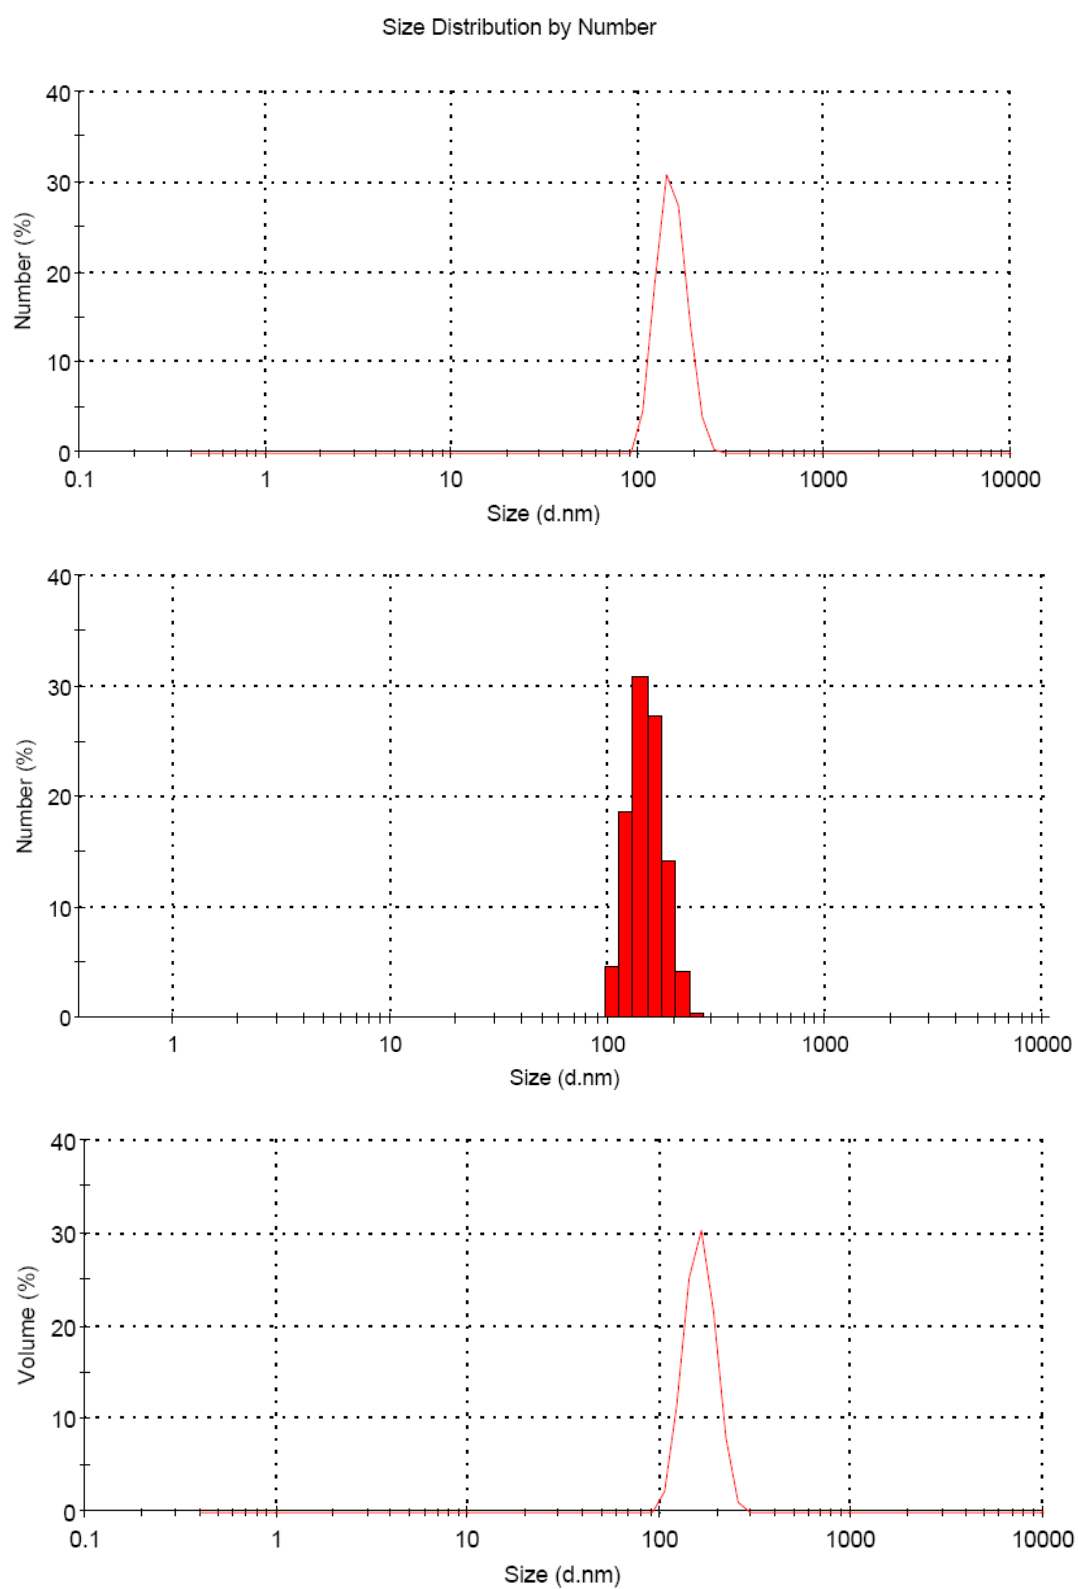

Fig. S4 DLS result for Mn-Ca oxide.

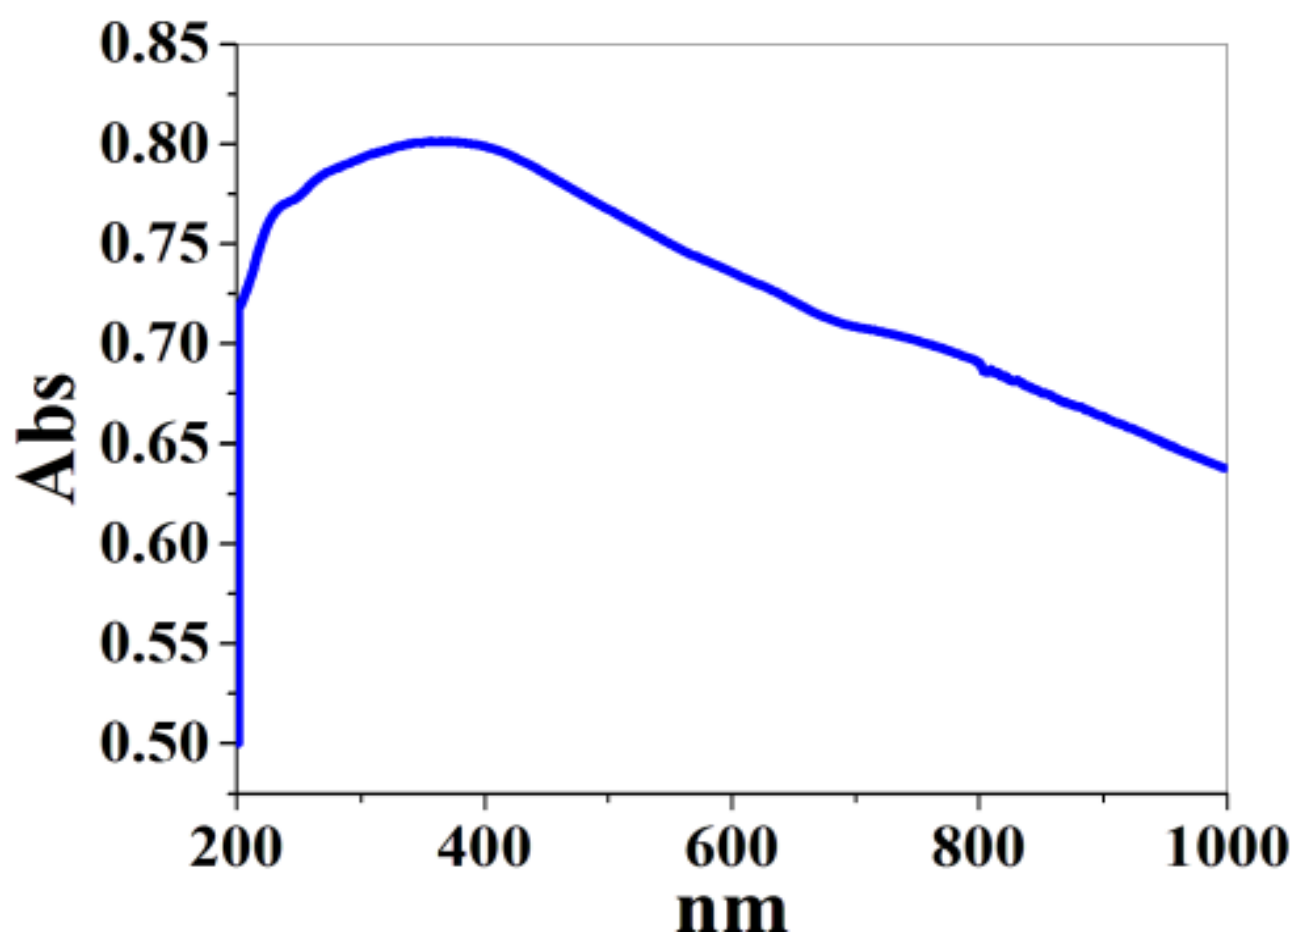

Fig. S5 Solid UV-Vis spectrum of Mn-Ca oxide
